# Supplementary material for: The translational landscape of ground state pluripotency
Source: PubMed Central journal article supplement (PMC7113317; doi:10.1038/s41467-020-15449-9), 2020-04-01
Supplement: 41467_2020_15449_MOESM4_ESM.pdf [file 41467_2020_15449_MOESM4_ESM.pdf]

## **Description of Additional Supplementary Files**

**Supplementary Data 1:** List of all datasets generated in this study

**Supplementary Data 2:** List of RFP, RNA and TE values in different states of pluripotency and during 2iL-SL-EPI transition

**Supplementary Data 3:** list of total proteome and differentially expressed proteins in different states of pluripotency and during 2iL-SL-EPI transition

**Supplementary Data 4:** Integrative list of RFP, RNA and protein values in different states of pluripotency and during 2iL-SL-EPI transition. Genes that were uniquely assigned at RNA, RFP and protein levels and in all three ESC-states are shown.

**Supplementary Data 5:** List of differentially expressed genes that are grouped based on their specific transcriptional, translational or post-translational regulation downstream of GSK- or MEK-inhibition

**Supplementary Data 6:** List of employed primers
